# Supplementary material
Source: PubMed Central journal article supplement (PMC3498100)
Supplement: NIHMS359630-supplement-1.pdf [file NIHMS359630-supplement-1.pdf]

SUPPLEMENTAL MATERIAL

**Table S1. Pooled results of visits3 and 4A for concurrent associations between symptoms and MRI infarcts along with breakdown of results separately for Baseline MRI visit and Follow-up MRI visit.**

|                                     | <b>Unadjusted Odds Ratio of having concurrent MRI infarcts (95% confidence interval; p-value)</b> | <b>Adjusted<sup>1</sup> Odds Ratio of having concurrent MRI infarcts (95% confidence interval; p-value)</b> | <b>Adjusted<sup>2</sup> Odds Ratio of having concurrent MRI infarcts (95% confidence interval; p-value)</b> |
|-------------------------------------|---------------------------------------------------------------------------------------------------|-------------------------------------------------------------------------------------------------------------|-------------------------------------------------------------------------------------------------------------|
| <b>Baseline MRI visit (n=1873)</b>  |                                                                                                   |                                                                                                             |                                                                                                             |
| ≥ 1 Symptom                         | 2.24 (1.16, 4.32; 0.016)                                                                          | 2.40 (1.22, 4.74; 0.012)                                                                                    | 2.30 (1.15, 4.59; 0.018)                                                                                    |
| Speech problem                      | 6.66 (2.22, 20.01; 0.001)                                                                         | 6.50 (2.07, 20.44; 0.001)                                                                                   | 5.60 (1.75,17.86; 0.004)                                                                                    |
| Vision problem                      | 1.80 (0.60, 5.40; 0.29)                                                                           | 2.22 (0.72, 6.87; 0.17)                                                                                     | 2.04 (0.65, 6.41; 0.23)                                                                                     |
| Double vision                       | 2.33 (0.24, 22.44;0.47)                                                                           | 2.54 (0.22, 29.79; 0.46)                                                                                    | 2.02 (0.55, 7.49; 0.29)                                                                                     |
| Paralysis                           | ***                                                                                               | ***                                                                                                         | ***                                                                                                         |
| Dizziness                           | 1.90 (0.40, 9.02; 0.42)                                                                           | 2.11 (0.42, 10.70; 0.37)                                                                                    | 2.01 (0.39, 10.47; 0.41)                                                                                    |
| Numbness                            | ***                                                                                               | ***                                                                                                         | ***                                                                                                         |
| TIA symptoms                        | 2.69 (1.19, 6.08; 0.018)                                                                          | 2.62 (1.12, 6.09; 0.026)                                                                                    | 2.41 (1.02, 5.69; 0.04)                                                                                     |
| Stroke symptoms                     | 1.45 (0.49, 4.25; 0.50)                                                                           | 1.82 (0.60, 5.51; 0.29)                                                                                     | 1.86 (0.61, 5.72; 0.28)                                                                                     |
| <b>Follow-up MRI visit (n=1006)</b> |                                                                                                   |                                                                                                             |                                                                                                             |
| ≥ 1 Symptom                         | 2.11 (1.18, 3.78; 0.012)                                                                          | 2.02 (1.12, 3.65; 0.02)                                                                                     | 1.84 (1.00, 3.38; 0.048)                                                                                    |

|                                                                    |                             |                             |                             |
|--------------------------------------------------------------------|-----------------------------|-----------------------------|-----------------------------|
| Speech problem                                                     | 1.89 (0.45, 7.97; 0.39)     | 2.00 (0.46, 8.75; 0.36)     | 1.66 (0.38, 7.27; 0.50)     |
| Vision problem                                                     | 1.77 (0.81, 3.89; 0.15)     | 1.64 (0.73, 3.66; 0.23)     | 1.59 (0.71, 3.57; 0.26)     |
| Double vision                                                      | 1.57 (0.39, 6.34; 0.52)     | 1.49 (0.36, 6.07; 0.58)     | 1.53 (0.37, 6.35; 0.56)     |
| Paralysis                                                          | 12.70 (1.41, 114.20; 0.023) | 14.55 (1.57, 134.44; 0.018) | 10.06 (1.01, 100.00; 0.049) |
| Dizziness                                                          | 3.14 (0.20, 50.33; 0.42)    | 3.50 (0.22, 56.50; 0.38)    | 3.14 (0.19, 50.79; 0.42)    |
| Numbness                                                           | 4.79 ( 1.34, 17.12; 0.016)  | 4.80 ( 1.32, 17.44; 0.017)  | 3.71 (0.95, 14.46; 0.06)    |
| TIA symptoms                                                       | 1.09 (0.48, 2.47; 0.84)     | 1.09 (0.48, 2.51; 0.84)     | 1.09 (0.47, 2.53; 0.84)     |
| Stroke symptoms                                                    | 5.30 (2.17, 12.95; <0.001)  | 4.84 (1.95, 12.02; 0.001)   | 4.00 (1.59, 10.07; 0.003)   |
| <b>Pooled Data from<br/>Baseline and Follow-<br/>up MRI visits</b> |                             |                             |                             |
| ≥ 1 Symptom                                                        | 2.15 (1.35, 3.44; 0.001)    | 2.09 (1.31, 3.32; 0.002)    | 1.95 (1.21, 3.13; 0.006)    |
| Speech problem                                                     | 4.08 (1.59, 10.51; 0.004)   | 3.97 (1.47, 10.72; 0.007)   | 3.54 (1.33, 9.41; 0.11)     |
| Vision problem                                                     | 1.78 (0.94, 3.38; 0.08)     | 1.75 (0.86, 3.55; 0.12)     | 1.66 (0.83, 3.35; 0.16)     |
| Double vision                                                      | 1.26 (0.35, 4.56; 0.73)     | 1.07 (0.28, 4.20; 0.92)     | 1.00 (0.24, 4.15; 1.00)     |
| Paralysis                                                          | 4.38 (1.27, 15.05; 0.02)    | 4.51 (1.50, 13.55; 0.007)   | 3.23 (0.97, 10.70; 0.06)    |
| Dizziness                                                          | 2.14 (0.58, 7.91; 0.26)     | 2.21 (0.57, 8.52; 0.25)     | 2.13 (0.57, 7.98; 0.26)     |
| Numbness                                                           | 1.92 (0.80, 4.60; 0.14)     | 2.01 (0.84, 4.79; 0.12)     | 1.53 (0.60, 3.91; 0.37)     |
| TIA symptoms                                                       | 1.57 (.83, 2.97; 0.16)      | 1.52 (0.81, 2.87; 0.20)     | 1.47 (0.77, 2.79; 0.24)     |
| Stroke symptoms                                                    | 3.13 (1.64, 5.97; 0.001)    | 3.08 (1.63, 5.83; 0.001)    | 2.79 (1.46, 5.33; 0.002)    |

\*\*\* Indicates failure of model convergence

**Table S2. Few symptomatic participants at visit 3 or visit 4A continued to report symptoms on follow-up visits.**

|  | Baseline MRI visit | Visit 4     |           | Total |
|--|--------------------|-------------|-----------|-------|
|  |                    | No Symptoms | Symptoms  |       |
|  | No Symptoms        | 955 (98%)   | 21 (2%)   | 976   |
|  | Symptoms           | 21 (88%)    | 3 (12%)   | 24    |
|  |                    | <b>976</b>  | <b>24</b> |       |

|  | Baseline MRI visit | Follow-up MRI visit |           | Total |
|--|--------------------|---------------------|-----------|-------|
|  |                    | No Symptoms         | Symptoms  |       |
|  | No Symptoms        | 942 (93%)           | 68 (7%)   | 1010  |
|  | Symptoms           | 3 (96%)             | 1 (4%)    | 4     |
|  |                    | <b>945</b>          | <b>69</b> |       |

|                |                    | Follow-up MRI visit |                | Total      |
|----------------|--------------------|---------------------|----------------|------------|
|                |                    | No Symptoms         | Symptoms       |            |
| <b>Visit 4</b> | <b>No Symptoms</b> | <b>912 (94%)</b>    | <b>63 (6%)</b> | <b>975</b> |
|                | <b>Symptoms</b>    | <b>20 (83%)</b>     | <b>4 (17%)</b> | <b>24</b>  |
|                |                    | <b>932</b>          | <b>67</b>      |            |

**Assessment of Missing MRI Data**

**Table S3.** Baseline MRI visit and Visit 4 characteristics of those with and without MRI at Follow-Up MRI Visit. Participants with MRI at baseline but not Follow-up MRI visit (46%) were older, had higher systolic blood pressure, triglycerides and BMI, lower HDL, had higher prevalence of hypertension and diabetes and smoking history, although most differences were of questionable clinical significance. Participants at visit 4 who did not have MRI at Follow-up MRI visit (3%) had higher systolic and diastolic blood pressure and more prevalent diagnosis of hypertension.

| <b>Baseline MRI<br/>Visit<br/>characteristics</b> | <b>Missing MRI</b>                            |                                                         | <b>Difference:<br/>Missing-Nonmissing</b> | <b>p-value for<br/>difference</b> |
|---------------------------------------------------|-----------------------------------------------|---------------------------------------------------------|-------------------------------------------|-----------------------------------|
|                                                   | <b>At Follow up<br/>MRI visit<br/>(n=873)</b> | <b>MRI done at<br/>Follow up MRI<br/>Visit (n=1006)</b> |                                           |                                   |
| Age                                               | 63.5 (4.5)                                    | 62.3 (4.4)                                              | 1.29 (0.89, 1.70)                         | <0.0001                           |
| SBP                                               | 130 (21.7)                                    | 126 (19.5)                                              | 4.13 (2.25, 6.01)                         | <0.0001                           |
| DBP                                               | 71 (11.7)                                     | 72 (10.6)                                               | -0.77 (-1.78, 0.25)                       | 0.14                              |
| Cholesterol                                       | 211 (39)                                      | 211 (38)                                                | -0.62 (-4.13, 2.89)                       | 0.73                              |
| HDL Cholesterol                                   | 54 (21)                                       | 57 (19)                                                 | -2.93 (-4.75, -1.11)                      | 0.002                             |
| LDL Cholesterol                                   | 128 (36)                                      | 128 (35)                                                | 0.21 (-3.04, 3.45)                        | 0.90                              |
| Triglycerides                                     | 142 (107)                                     | 131 (75)                                                | 11.54 (3.11, 19.97)                       | 0.007                             |
| BMI                                               | 28.2 (5.7)                                    | 27.7 (4.8)                                              | 0.52 (0.04, 1.00)                         | 0.03                              |
| Hypertension                                      | 466 (54%)                                     | 434 (43%)                                               | 11% (6%, 15%)                             | <0.001                            |
| Diabetes                                          | 153 (18%)                                     | 115 (12%)                                               | 6% (3%, 9%)                               | <0.001                            |

|         |           |           |                 |        |
|---------|-----------|-----------|-----------------|--------|
| Smoking |           |           |                 | <0.001 |
| Never   | 358 (41%) | 479 (48%) | -7% (-11%, -2%) |        |
| Former  | 308 (35%) | 385 (38%) | 3% (-7%, 1%)    |        |
| Current | 204 (24%) | 138 (14%) | 10% (6%, 13%)   |        |

| <b>Missing MRI</b>     |                     |                      |                           |                    |
|------------------------|---------------------|----------------------|---------------------------|--------------------|
|                        | <b>At Follow up</b> | <b>MRI done at</b>   |                           |                    |
| <b>Visit 4</b>         | <b>MRI visit</b>    | <b>Follow up MRI</b> | <b>Difference:</b>        | <b>p-value for</b> |
| <b>characteristics</b> | <b>(n=30)</b>       | <b>Visit (n=976)</b> | <b>Missing-Nonmissing</b> | <b>difference</b>  |
| Age                    | 66.53 (3.81)        | 65.24 (4.37)         | 1.30 (-0.15, 2.74)        | 0.08               |
| SBP                    | 137.50 (21.84)      | 128.78 (18.90)       | 8.72 (0.49, 16.96)        | 0.04               |
| DBP                    | 77.33 (13.18)       | 70.93 (10.00)        | 6.40 (1.44, 11.36)        | 0.01               |
| Cholesterol            | 197.64 (34.94)      | 201.71 (38.72)       | -4.07 (-17.56, 9.42)      | 0.54               |
| HDL Cholesterol        | 51.71 (14.62)       | 52.62 (16.63)        | -0.90 (-6.55, 4.75)       | 0.75               |
| LDL Cholesterol        | 120.90 (34.62)      | 122.86 (33.19)       | -1.96 (-15.54, 11.61)     | 0.77               |
| Triglycerides          | 133.19 (79.22)      | 131.97 (80.66)       | 1.22 (-29.29, 31.74)      | 0.94               |
| Body Mass              |                     |                      | 1.27 (-0.44, 2.99)        |                    |
| Index                  | 29.36 (4.52)        | 28.09 (4.93)         |                           | 0.14               |
| Hypertension           | 22 (73%)            | 483 (50%)            | 24% (7%, 40%)             | 0.02               |
| Diabetes               | 7 (23%)             | 139 (14%)            | 9% (-6%, 24%)             | 0.19               |
| Smoking                |                     |                      |                           | 0.45               |
| Never                  | 11 (37%)            | 462 (48%)            | -11% (-28% , 7%)          |                    |
| Former                 | 14 (47%)            | 386 (39%)            | 7% (-11%, 25%)            |                    |

---

|         |         |           |               |
|---------|---------|-----------|---------------|
| Current | 5 (16%) | 122 (13%) | 4% (-9%, 18%) |
|---------|---------|-----------|---------------|

---

t-test with unequal variance and Chi-Squared used for continuous and categorical variables respectively

Values for differences are estimates (95% confidence interval)
